# Supplementary material
Source: PubMed Central journal article supplement (PMC3682473)
Supplement: NIHMS473424-supplement-supplement_1.pdf [file NIHMS473424-supplement-supplement_1.pdf]

APPENDIX A:

Supplementary Table 1: Qualitative representation of predominant ‘up-regulated’ transcripts (vertical arrows) organized by specific biological functions in intramolluscan larval stages of *S. mansoni* miracidia, 4 day-sporocysts (mira and spo-4d, respectively; Vermeire *et al.* 2006), 6- and 20-day old sporocysts (spo-6d and spo-20d, respectively; Williams *et al.* 2006; Taft *et al.* 2009), secondary sporocysts and cercariae (2nd spo and cerc, respectively; Jolly *et al.* 2007), *S. japonicum* miracidia, sporocysts and cercariae (Gobert *et al.* 2009), and female (cerc-fem) and male (cerc-male) cercariae of *S. mansoni* (Fitzpatrick *et al.* 2008).

| Biological function                       | Example of proteins                      | <i>S. mansoni</i>       |        |        |         |                    | <i>S. japonicum</i> |      |     | <i>S. mansoni</i> |             |           |
|-------------------------------------------|------------------------------------------|-------------------------|--------|--------|---------|--------------------|---------------------|------|-----|-------------------|-------------|-----------|
|                                           |                                          | mira                    | spo-4d | spo-6d | spo-20d | 2 <sup>d</sup> spo | cerc                | mira | spo | cerc              | cerc-female | cerc-male |
| Anti-oxidants                             | Glutathione peroxidase 1 (GPX)           | ↑                       |        | ↑      | ↑       |                    |                     |      |     |                   |             |           |
|                                           | Peroxiredoxins (Prxs)                    |                         | ↑      | ↑      | ↑       |                    |                     |      |     |                   |             |           |
|                                           | Translationally-controlled tumor protein | ↑                       | ↑      | ↑      | ↑       |                    |                     |      |     |                   |             |           |
|                                           | Thioredoxin                              |                         |        |        |         | ↑                  |                     |      |     | ↑                 |             |           |
|                                           | GST26                                    |                         |        | ↑      | ↑       |                    |                     |      |     |                   |             |           |
|                                           | GST28                                    |                         |        | ↑      | ↑       | ↑                  |                     |      |     |                   |             |           |
|                                           | Cu/Zn SOD                                |                         | ↑      | ↑      | ↑       |                    |                     |      |     |                   |             |           |
|                                           | Sec SOD                                  | ↑                       |        |        |         |                    |                     |      |     |                   |             |           |
|                                           | Mn SOD                                   |                         |        | ↑      |         |                    |                     |      |     |                   |             |           |
|                                           | PRx1                                     |                         | ↑      | ↑      | ↑       |                    |                     |      |     |                   |             |           |
|                                           | Prx2                                     |                         | ↑      |        | ↑       |                    |                     |      |     |                   |             |           |
|                                           | Glycerol 3 phosphate dehydrogenase       | ↑                       |        |        |         | ↑                  | ↑                   |      |     |                   |             |           |
|                                           | Chaperone/heat shock protein             | p40 egg antigen (HSP27) | ↑      |        |         |                    |                     |      |     |                   |             |           |
| HSP90                                     |                                          | ↑                       |        |        |         | ↑                  |                     |      |     |                   |             |           |
| HSP40/DnaJ                                |                                          | ↑                       |        |        |         |                    |                     |      |     |                   |             |           |
| HSP70/BiP                                 |                                          | ↑                       |        |        |         | ↑                  |                     |      |     |                   |             | ↑         |
| USP (universal stress protein-like)       |                                          | ↑                       |        |        |         |                    |                     |      |     |                   |             |           |
| Cytochrome C copper chaperone             |                                          |                         |        |        |         |                    |                     |      |     |                   | ↑           |           |
| Carbohydrate metabolism/energy production | Glycogen phosphorylase homologues        | ↑                       |        |        |         |                    |                     |      |     |                   |             |           |
|                                           | Triose phosphate isomerase               | ↑                       |        |        |         |                    | ↑                   | ↑    | ↑   |                   |             |           |
|                                           | Phosphoglucomutase                       | ↑                       |        |        |         |                    |                     |      |     |                   |             |           |
|                                           | Phosphoenol pyruvate carboxykinase       | ↑                       |        |        |         |                    |                     |      |     |                   |             |           |
|                                           | Carboxykinase (PEPCK)                    | ↑                       |        |        |         |                    |                     |      |     |                   |             |           |
|                                           | Glycoprotein kappa-5                     | ↑                       |        |        |         |                    |                     |      |     |                   |             |           |
|                                           | ATP-synthase lipid binding protein       |                         |        |        |         | ↑                  |                     |      |     |                   |             |           |
|                                           | High mobility group-like prot. 2         |                         |        |        |         | ↑                  |                     |      |     |                   |             |           |
|                                           | Cytochrome b                             |                         |        |        |         | ↑                  |                     |      |     |                   |             |           |
|                                           | Cytochrome c                             |                         | ↑      | ↑      | ↑       | ↑                  | ↑                   | ↑    | ↑   | ↑                 |             |           |
|                                           | NADH dehydrogenase 4                     |                         |        |        |         | ↑↑                 | ↑                   |      |     |                   |             |           |
|                                           | NADH dehydrogenase 5/6                   |                         |        |        |         | ↑6                 | ↑5/6                |      |     |                   | ↑5          |           |
|                                           | ATPase subunit6                          |                         |        |        |         | ↑↑                 | ↑                   |      |     |                   |             |           |
| LDH                                       | ↑                                        |                         |        |        |         |                    |                     |      |     |                   |             |           |

|                                   |                                      |                                   |                |   |   |   |  |    |    |   |    |      |      |   |  |
|-----------------------------------|--------------------------------------|-----------------------------------|----------------|---|---|---|--|----|----|---|----|------|------|---|--|
| Calcium interactive protein       | SME16                                | ↑                                 |                |   |   |   |  |    |    |   |    |      |      |   |  |
|                                   | Calcineurin B                        | ↑                                 |                |   |   |   |  |    |    |   |    |      |      |   |  |
|                                   | Calreticulin                         |                                   | ↑              | ↑ | ↑ |   |  |    |    |   |    |      |      |   |  |
|                                   | Calmodulin                           |                                   | ↑              | ↑ | ↑ |   |  |    | ↑  | ↑ |    |      |      |   |  |
|                                   | 8KD-Ca bp containing EF-hand domains |                                   |                |   |   |   |  |    | ↑  |   |    |      |      |   |  |
|                                   | Calcium channel beta subunit 2       | ↑                                 |                |   |   |   |  |    |    |   |    |      |      |   |  |
|                                   | Calcium ATPase                       | ↑                                 |                |   |   |   |  |    |    |   |    |      |      |   |  |
|                                   | Calponin homologue                   |                                   |                |   |   |   |  |    | ↑  | ↑ |    | ↑    |      |   |  |
| Protease                          | 16 Kd ca-binding protein             | ↑                                 |                |   |   |   |  |    |    |   |    |      |      |   |  |
|                                   | Cathepsin                            |                                   | ↑ <sup>C</sup> | ↑ | ↑ | ↑ |  |    |    |   |    | ↑(L) | ↑(L) |   |  |
|                                   | Elastase                             |                                   | ↑              | ↑ | ↑ | ↑ |  |    |    |   |    |      |      |   |  |
|                                   | Preprocathepsin                      |                                   | ↑              | ↑ | ↑ |   |  |    |    |   |    |      |      |   |  |
|                                   | Serine-enzyme                        |                                   |                |   |   |   |  |    | ↑  |   |    |      |      | ↑ |  |
|                                   | Succinate dehydrogenase              | ↑                                 |                |   |   |   |  |    |    |   |    |      |      |   |  |
|                                   | Esterase a                           |                                   |                |   |   |   |  |    |    |   |    |      | ↑    |   |  |
| Motility                          | Enolase                              |                                   |                |   |   |   |  | ↑↑ | ↑  |   |    |      |      |   |  |
|                                   | Dynein light chain (Sj21·7 and Sm10) |                                   |                |   |   |   |  |    |    | ↑ | ↑  |      |      |   |  |
|                                   | Muscle glycogen phosphorylase -like  | ↑                                 |                |   |   |   |  |    |    | ↑ |    |      |      |   |  |
|                                   | Monocarboxylate transporter          |                                   |                |   |   |   |  |    |    | ↑ |    |      |      |   |  |
|                                   | Plexin domain                        |                                   |                |   |   |   |  |    |    |   | ↑↑ |      |      |   |  |
|                                   | Pyruvate kinase                      |                                   |                |   |   |   |  |    |    |   | ↑  | ↑    |      |   |  |
|                                   | UDP-glucose dehydrogenase            |                                   |                |   |   |   |  |    |    |   | ↑  | ↑    |      |   |  |
|                                   | Leu transmembrane prot 1             |                                   |                |   |   |   |  |    |    |   |    | ↑    |      |   |  |
|                                   | Dynamin 1                            |                                   |                |   |   |   |  |    |    |   |    |      | ↑↑   |   |  |
|                                   | Actin bp 1                           |                                   |                |   |   |   |  |    |    |   |    |      | ↑↑   |   |  |
|                                   | Glutamine synthetase                 |                                   |                |   |   |   |  |    |    |   |    |      | ↑    |   |  |
|                                   | Sj16 anti inflamm                    |                                   |                |   |   |   |  |    |    | ↑ |    | ↑    |      |   |  |
|                                   | Tubulin beta chain                   |                                   |                |   |   |   |  | ↑↑ | ↑  |   |    |      |      |   |  |
|                                   | Actin-F                              |                                   |                |   |   |   |  | ↑↑ | ↑  |   |    |      | ↑    |   |  |
|                                   | Fibrillarlin                         |                                   |                |   |   |   |  | ↑↑ | ↑  |   |    |      |      | ↑ |  |
|                                   | Myosin light chain                   | ↑                                 |                |   |   |   |  | ↑  | ↑  |   |    |      |      |   |  |
|                                   | Myosin heavy chain                   |                                   |                |   |   |   |  | ↑↑ | ↑  |   |    |      |      |   |  |
|                                   | Other                                | Polo-like kinase                  |                | ↑ | ↑ | ↑ |  |    |    |   |    |      |      |   |  |
|                                   |                                      | 14.3.3 fatty acid binding protein |                | ↑ | ↑ | ↑ |  |    |    |   |    |      |      |   |  |
| Stathmin-like protein spo1        |                                      |                                   |                |   |   |   |  | ↑↑ | ↑  |   |    |      |      |   |  |
| ATP guanidokinase                 |                                      |                                   |                |   |   |   |  | ↑  | ↑  |   |    |      |      |   |  |
| Phosphofructokinase               |                                      | ↑                                 |                |   |   |   |  |    |    |   |    |      |      |   |  |
| Endothelin B receptor             |                                      |                                   |                |   |   |   |  |    |    |   |    |      | ↑    |   |  |
| Rho3                              |                                      | ↑                                 |                |   |   |   |  |    |    |   |    |      |      |   |  |
| Sm16 anti-inflammatory glycoprot. |                                      |                                   |                |   |   |   |  |    | ↑↑ | ↑ |    | ↑    |      |   |  |
| Flavo-hemoglobin                  |                                      |                                   |                |   |   |   |  |    |    |   |    |      |      |   |  |
| MGE,                              |                                      |                                   |                |   |   |   |  |    |    |   |    |      | ↑    |   |  |
| Egg secreted protein 3-6          |                                      | ↑                                 |                |   |   |   |  |    |    |   |    |      | ↑    |   |  |
| Insulin-like peptide receptor     |                                      |                                   |                |   |   |   |  |    |    | ↑ |    |      |      |   |  |

Manipulation of gene expression in larval Schistosoma
